# Supplementary material
Source: Springer Nature journal article supplement (https://www.springermedizin.de/resource/supplementary/12936_2005_142_MOESM1_ESM.pdf/9546976)

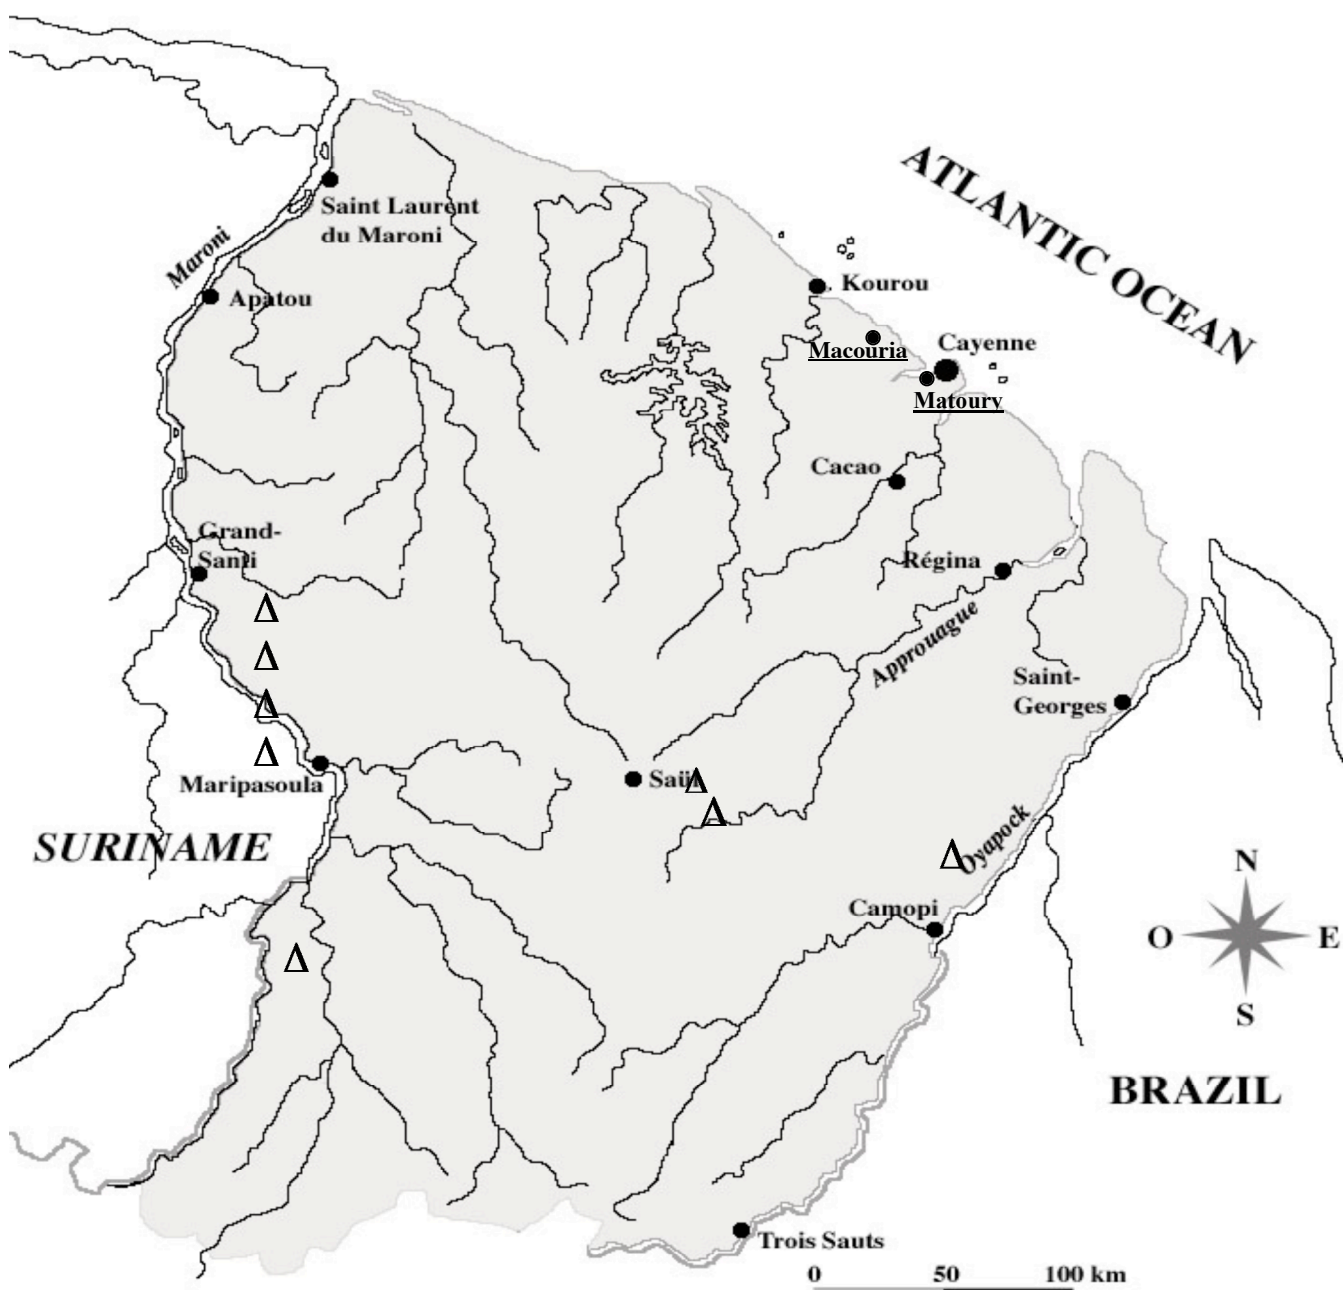

ATLANTIC OCEAN

SURINAME

BRAZIL

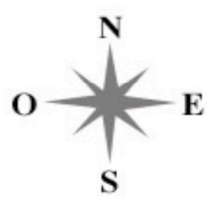

0 50 100 km

Supplement: MOESM1 [file 9546976]
